# Supplementary material for: Geographical Variation in Body Size in the Asian Common Toad (Duttaphrynus melanostictus)
Source: MDPI journal article supplement (doi:10.3390/life13112219), 2023-11-17
Supplement: s1 [file s1]

**Table S1.** The toad museum number information at different collecting sites

| Sample site         | Longitude (E) | Latitude (N) | Number     | Species name                                            | Sex    |
|---------------------|---------------|--------------|------------|---------------------------------------------------------|--------|
| Midu County, Yunnan | 100°29'       | 25°20'       | 2018050201 | Asian common toad ( <i>Duttaphrynus melanostictus</i> ) | male   |
| Midu County, Yunnan | 100°29'       | 25°20'       | 2018050202 | Asian common toad ( <i>Duttaphrynus melanostictus</i> ) | female |
| Midu County, Yunnan | 100°29'       | 25°20'       | 2018050203 | Asian common toad ( <i>Duttaphrynus melanostictus</i> ) | male   |
| Midu County, Yunnan | 100°29'       | 25°20'       | 2018050204 | Asian common toad ( <i>Duttaphrynus melanostictus</i> ) | male   |
| Midu County, Yunnan | 100°29'       | 25°20'       | 2018050205 | Asian common toad ( <i>Duttaphrynus melanostictus</i> ) | male   |
| Midu County, Yunnan | 100°29'       | 25°20'       | 2018050206 | Asian common toad ( <i>Duttaphrynus melanostictus</i> ) | female |
| Midu County, Yunnan | 100°29'       | 25°20'       | 2018050207 | Asian common toad ( <i>Duttaphrynus melanostictus</i> ) | male   |
| Midu County, Yunnan | 100°29'       | 25°20'       | 2018050208 | Asian common toad ( <i>Duttaphrynus melanostictus</i> ) | female |
| Midu County, Yunnan | 100°29'       | 25°20'       | 2018050209 | Asian common toad ( <i>Duttaphrynus melanostictus</i> ) | male   |
| Midu County, Yunnan | 100°29'       | 25°20'       | 2018050210 | Asian common toad ( <i>Duttaphrynus melanostictus</i> ) | female |
| Midu County, Yunnan | 100°29'       | 25°20'       | 2018050211 | Asian common toad ( <i>Duttaphrynus melanostictus</i> ) | male   |
| Midu County, Yunnan | 100°29'       | 25°20'       | 2018050212 | Asian common toad ( <i>Duttaphrynus melanostictus</i> ) | male   |
| Midu County, Yunnan | 100°29'       | 25°20'       | 2018050213 | Asian common toad ( <i>Duttaphrynus melanostictus</i> ) | male   |
| Midu County, Yunnan | 100°29'       | 25°20'       | 2018050214 | Asian common toad ( <i>Duttaphrynus melanostictus</i> ) | male   |
| Midu County, Yunnan | 100°29'       | 25°20'       | 2018050215 | Asian common toad ( <i>Duttaphrynus melanostictus</i> ) | male   |
| Midu County, Yunnan | 100°29'       | 25°20'       | 2018050216 | Asian common toad ( <i>Duttaphrynus melanostictus</i> ) | female |
| Midu County, Yunnan | 100°29'       | 25°20'       | 2018050217 | Asian common toad ( <i>Duttaphrynus melanostictus</i> ) | male   |
| Midu County, Yunnan | 100°29'       | 25°20'       | 2018050218 | Asian common toad ( <i>Duttaphrynus melanostictus</i> ) | female |
| Midu County, Yunnan | 100°29'       | 25°20'       | 2018050219 | Asian common toad ( <i>Duttaphrynus melanostictus</i> ) | female |
| Midu County, Yunnan | 100°29'       | 25°20'       | 2018050220 | Asian common toad ( <i>Duttaphrynus melanostictus</i> ) | male   |
| Midu County, Yunnan | 100°29'       | 25°20'       | 2018050221 | Asian common toad ( <i>Duttaphrynus melanostictus</i> ) | male   |
| Midu County, Yunnan | 100°29'       | 25°20'       | 2018050222 | Asian common toad ( <i>Duttaphrynus melanostictus</i> ) | male   |
| Midu County, Yunnan | 100°29'       | 25°20'       | 2018050223 | Asian common toad ( <i>Duttaphrynus melanostictus</i> ) | female |
| Midu County, Yunnan | 100°29'       | 25°20'       | 2018050224 | Asian common toad ( <i>Duttaphrynus melanostictus</i> ) | male   |

[illegible]

[illegible]

[illegible]

[illegible]

[illegible]
